# Supplementary material for: Activated endothelial cells induce a distinct type of astrocytic reactivity
Source: PubMed Central journal article supplement (PMC8964703; doi:10.1038/s42003-022-03237-8), 2022-03-29
Supplement: 42003_2022_3237_MOESM3_ESM.pdf [file 42003_2022_3237_MOESM3_ESM.pdf]

## Description of Additional Supplementary Files

**File name:** Supplementary Data 1

**Description:** NanoString gene set enrichment analysis.

**File name:** Supplementary Data 2

**Description:** RNA Sequencing Analysis.

**File name:** Supplementary Data 3

**Description:** Source data underlying the graphs and charts in the main manuscript.
